# Supplementary material
Source: publisher figshare collection journal article supplement (https://springernature.figshare.com/ndownloader/files/24108023)
Supplement: Supplementary file [file 24108023]

Table S26: Least square means of prediction accuracy of all models averaging over all the traits

| Model | Least square means $\pm$ SE | Group |
|-------|-----------------------------|-------|
| M0    | 0.15 $\pm$ 0.005            | A     |
| M1    | 0.21 $\pm$ 0.005            | C     |
| M2    | 0.23 $\pm$ 0.005            | B     |
| M3    | 0.24 $\pm$ 0.005            | C     |
| M4    | 0.25 $\pm$ 0.005            | C     |

Table S27. Least square means of prediction accuracy of three stages of production averaging over all the traits

| Stage    | Least square means $\pm$ SE | Group |
|----------|-----------------------------|-------|
| Wean     | 0.21 $\pm$ 0.004            | A     |
| Mid test | 0.22 $\pm$ 0.004            | B     |
| Off test | 0.23 $\pm$ 0.004            | C     |

Table S28. Least square means of prediction accuracy of three complexities of model averaging over all the traits

| Complexity | Least square means $\pm$ SE | Group |
|------------|-----------------------------|-------|
| Full       | 0.20 $\pm$ 0.004            | A     |
| IR         | 0.22 $\pm$ 0.004            | B     |
| RR         | 0.23 $\pm$ 0.004            | C     |

Table S29 Least square means of prediction accuracy of interaction of stage and model averaging over all the traits

| Interaction group | Least square means $\pm$ SE | Group |
|-------------------|-----------------------------|-------|
| Wean:M0           | 0.156 $\pm$ 0.005           | A     |
| Wean:M1           | 0.255 $\pm$ 0.005           | D     |
| Wean:M2           | 0.191 $\pm$ 0.005           | B     |
| Wean:M3           | 0.223 $\pm$ 0.005           | C     |
| Wean:M4           | 0.223 $\pm$ 0.005           | C     |
| Mid test:M0       | 0.157 $\pm$ 0.005           | A     |
| Mid test:M1       | 0.220 $\pm$ 0.005           | C     |
| Mid test:M2       | 0.255 $\pm$ 0.005           | D     |
| Mid test:M3       | 0.241 $\pm$ 0.005           | CD    |
| Mid test:M4       | 0.239 $\pm$ 0.005           | CD    |
| Off test:M0       | 0.155 $\pm$ 0.005           | A     |
| Off test:M1       | 0.230 $\pm$ 0.005           | C     |
| Off test:M2       | 0.255 $\pm$ 0.005           | D     |
| Off test:M3       | 0.242 $\pm$ 0.005           | CD    |
| Off test:M4       | 0.241 $\pm$ 0.005           | CD    |

Table S30. Least square means of prediction accuracy of interaction of complexity and model averaging over all the traits

| Interaction group | Least square means $\pm$ SE | Group |
|-------------------|-----------------------------|-------|
| IR:M0             | 0.156 $\pm$ 0.009           | A     |
| FULL:M0           | 0.156 $\pm$ 0.009           | A     |
| RR:M0             | 0.156 $\pm$ 0.009           | A     |
| RR:M2             | 0.174 $\pm$ 0.009           | AB    |
| FULL:M2           | 0.204 $\pm$ 0.009           | BC    |
| IR:M4             | 0.223 $\pm$ 0.009           | CD    |
| RR:M1             | 0.224 $\pm$ 0.009           | CD    |
| RR:M4             | 0.225 $\pm$ 0.009           | CD    |
| IR:M3             | 0.226 $\pm$ 0.009           | CD    |
| RR:M3             | 0.226 $\pm$ 0.009           | CD    |
| FULL:M1           | 0.235 $\pm$ 0.009           | CD    |
| FULL:M4           | 0.250 $\pm$ 0.009           | D     |
| FULL:M3           | 0.251 $\pm$ 0.009           | D     |
| IR:M2             | 0.263 $\pm$ 0.009           | DE    |
| IR:M1             | 0.305 $\pm$ 0.009           | E     |

M1 = Model containing genomic information only

M2 = Model containing microbiome information only

M3 = Model containing microbiome and genomic information

M4 = Model containing microbiome, genome and microbiome-by-genome information

FULL = Full complexity containing all markers and OTU

IR = Informatively reduced complexity containing informatively reduced markers or OTU

RR = Randomly reduced complexity containing randomly reduced markers or OTU

Different letters in group indicates that they are different.
